# Supplementary material for: Isolation of full-length IgG antibodies from combinatorial libraries expressed in the cytoplasm of Escherichia coli
Source: PubMed Central journal article supplement (PMC10267130; doi:10.1038/s41467-023-39178-x), 2023-06-14
Supplement: 41467_2023_39178_MOESM1_ESM.pdf [file 41467_2023_39178_MOESM1_ESM.pdf]

## Supplementary Information

### Isolation of full-length IgG antibodies from combinatorial libraries expressed in the cytoplasm of *Escherichia coli*

Michael-Paul Robinson<sup>1†</sup>, Jinjoo Jung<sup>1†</sup>, Natalia Lopez-Barbosa<sup>1\*</sup>, Matthew Chang<sup>1</sup>, Mingji Li<sup>1</sup>, Thapakorn Jaroentomeechai<sup>1</sup>, Emily C. Cox<sup>2</sup>, Xiaolu Zheng<sup>1</sup>, Mehmet Berkmen<sup>2</sup> and Matthew P. DeLisa<sup>1,2,4\*</sup>

<sup>1</sup>Robert F. Smith School of Chemical and Biomolecular Engineering, Cornell University, Ithaca, NY 14853 USA

<sup>2</sup>Biomedical and Biological Sciences, College of Veterinary Medicine, Cornell University, Ithaca, New York 14853 USA

<sup>3</sup>New England Biolabs, 240 County Road, Ipswich, Massachusetts 01938, USA

<sup>4</sup>Cornell Institute of Biotechnology, Cornell University, Ithaca, NY 14853, USA

†These authors have contributed equally to this work

\*Address correspondence to: Matthew P. DeLisa, Robert Frederick Smith School of Chemical and Biomolecular Engineering, Cornell University, Ithaca, NY 14853. Tel: 607-254-8560; Email: [md255@cornell.edu](mailto:md255@cornell.edu)

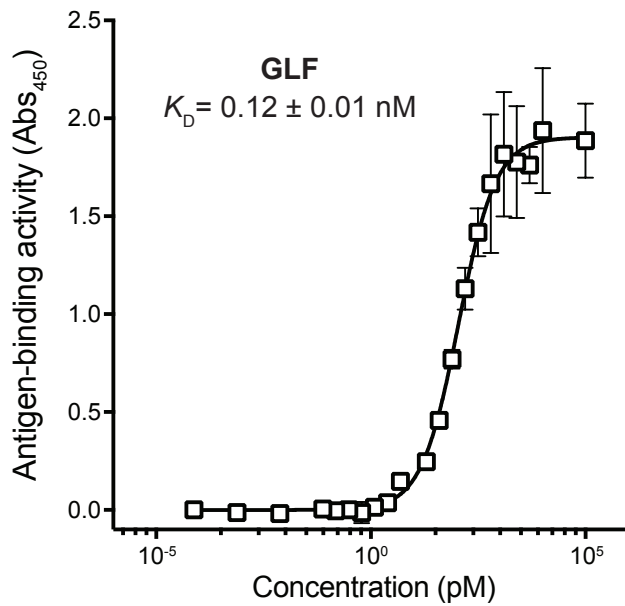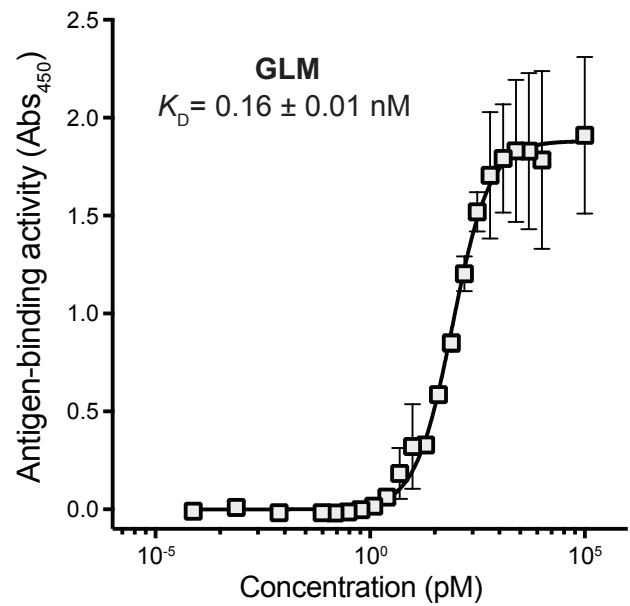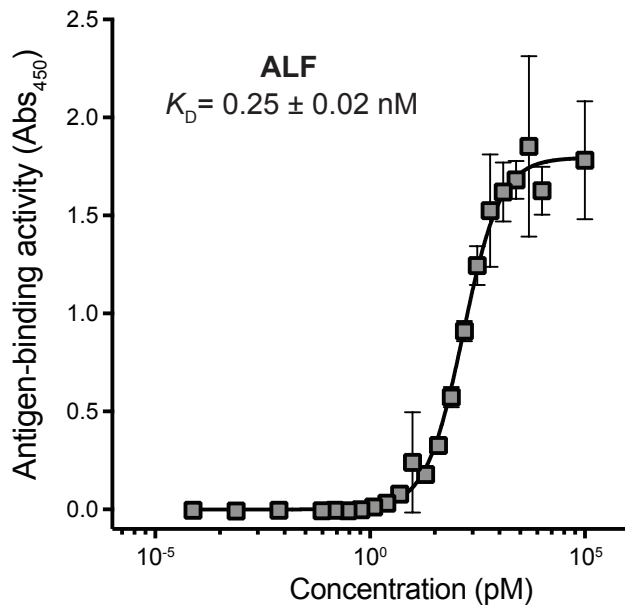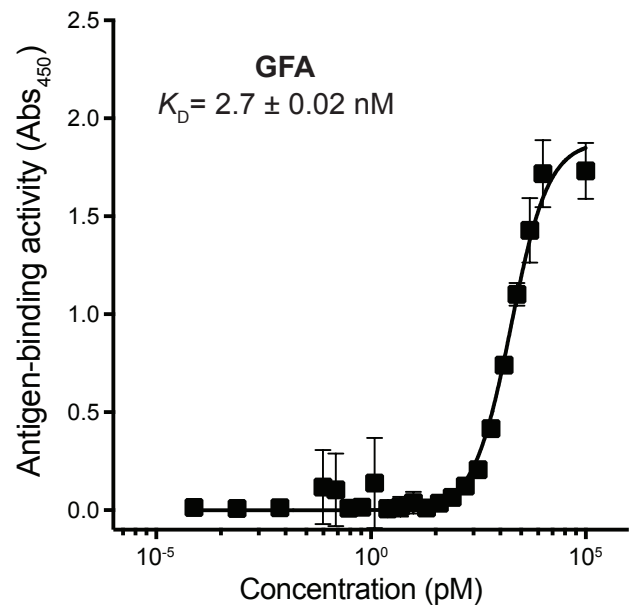

**Supplementary Figure 1. Affinity determination of cyclonal antibodies.** Binding affinity of cyclonals GLF, GLM, ALF, and GFA determined by ELISA with purified GST-Gcn4-PP as immobilized antigen. Absorbance was measured at 450 nm for each cyclonal variant and the resulting measurements were analyzed using GraphPad Prism 9 to determine  $K_D$ . Data are the average of biological replicates ( $n = 3$ ) and error bars represent the standard deviation. Source data are provided as a Source Data file.

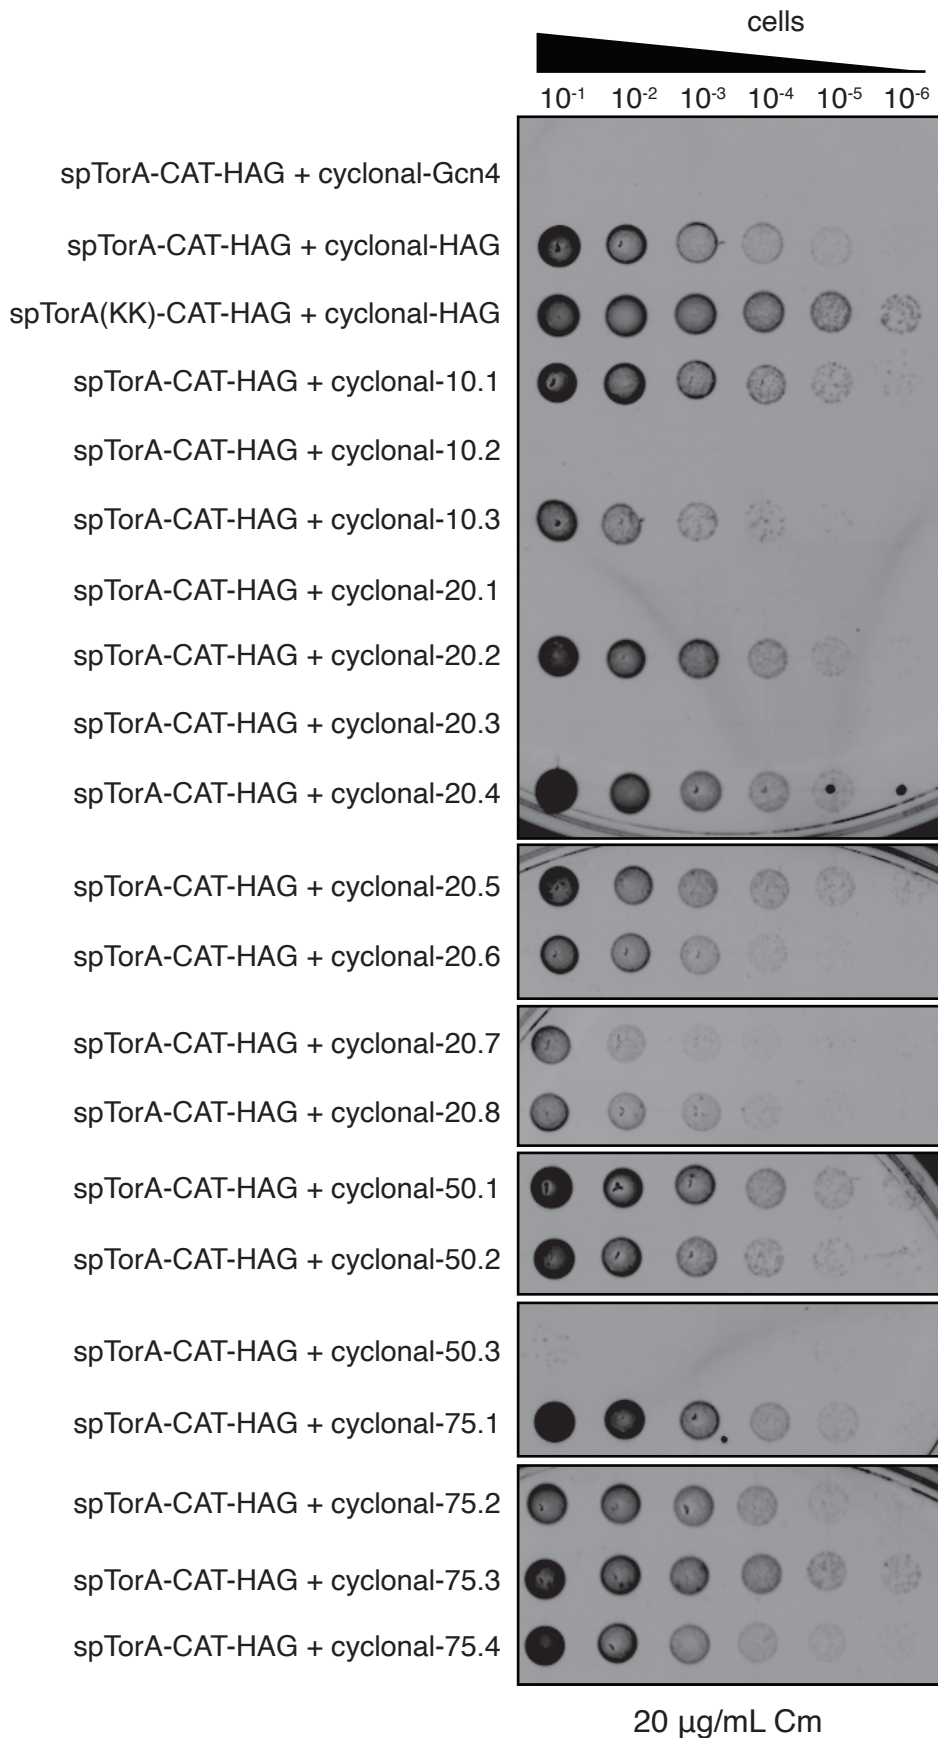

**Supplementary Figure 2. Genetic selection of lead cyclonal IgG candidates against HAG peptide.** Selective spot plating of SHuffle T7 Express cells carrying a plasmid encoding spTorA-CAT-HAG along with a second plasmid encoding a cyclonal IgG candidate that was selected for binding to the HAG peptide antigen. A total of 5 µl of 10-fold serial diluted cells was plated on LB-agar supplemented with 20 µg/ml chloramphenicol (Cm) as well as 0.4 % arabinose and 1 mM isopropyl β-D-thiogalactopyranoside (IPTG) to induce chimeric antigen and cyclonal expression, respectively. Cross-pairing the non-cognate Gcn4 cyclonal with HAG antigen or the HAG cyclonal with export-defective spTorA(KK)-CAT-HAG served as negative controls. Spot plating results are representative of at least three biological replicates.

**a**

| Cyclonal | Light chain |          | Heavy chain |             |          |
|----------|-------------|----------|-------------|-------------|----------|
|          | V           | J        | V           | D           | J        |
| 20.2     | IGKV4-1*01  | IGKJ1*01 | IGHV3-72*01 | IGHD1-7*01  | IGHJ2*01 |
| 75.1     | IGKV4-1*01  | IGKJ1*02 | IGHV3-23*04 | IGHD6-13*01 | IGHJ1*01 |

**b**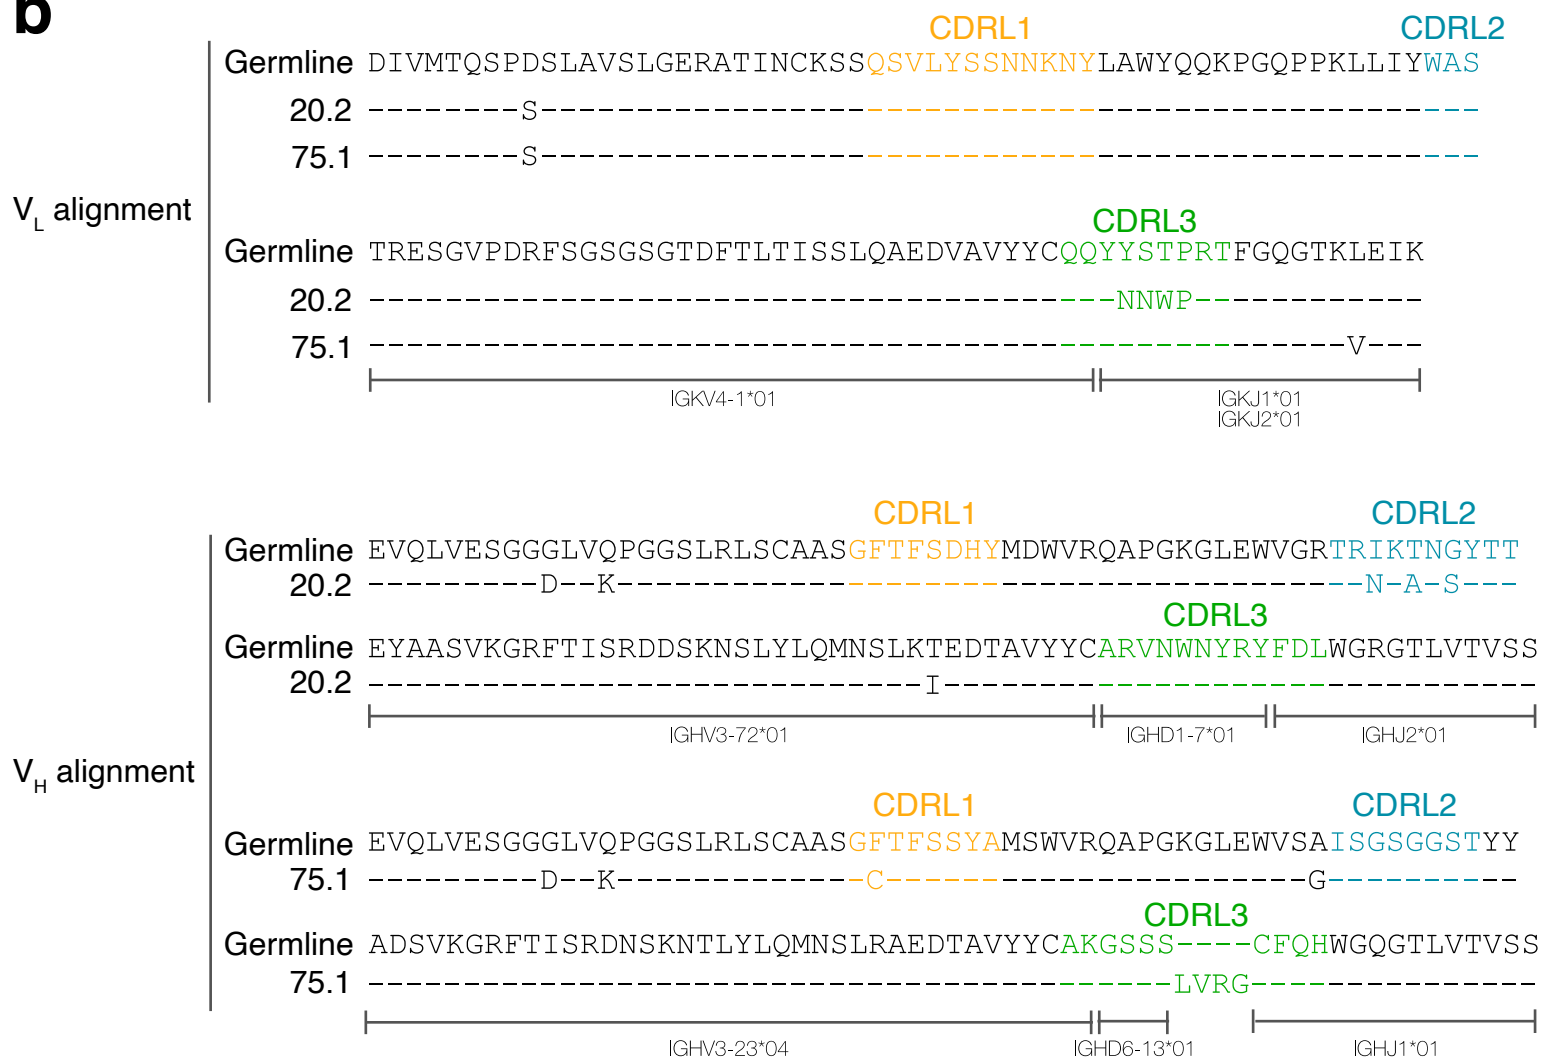

**Supplementary Figure 3. Immunoglobulin variable domain sequence analysis by IgBLAST of cyclonal hits.** (a) Germline gene usage and (b) assignment of 20-2 and 75-1 putative germline sequences using NCBI IgBLAST (Ye et al., 2013 *Nucleic Acids Research*).

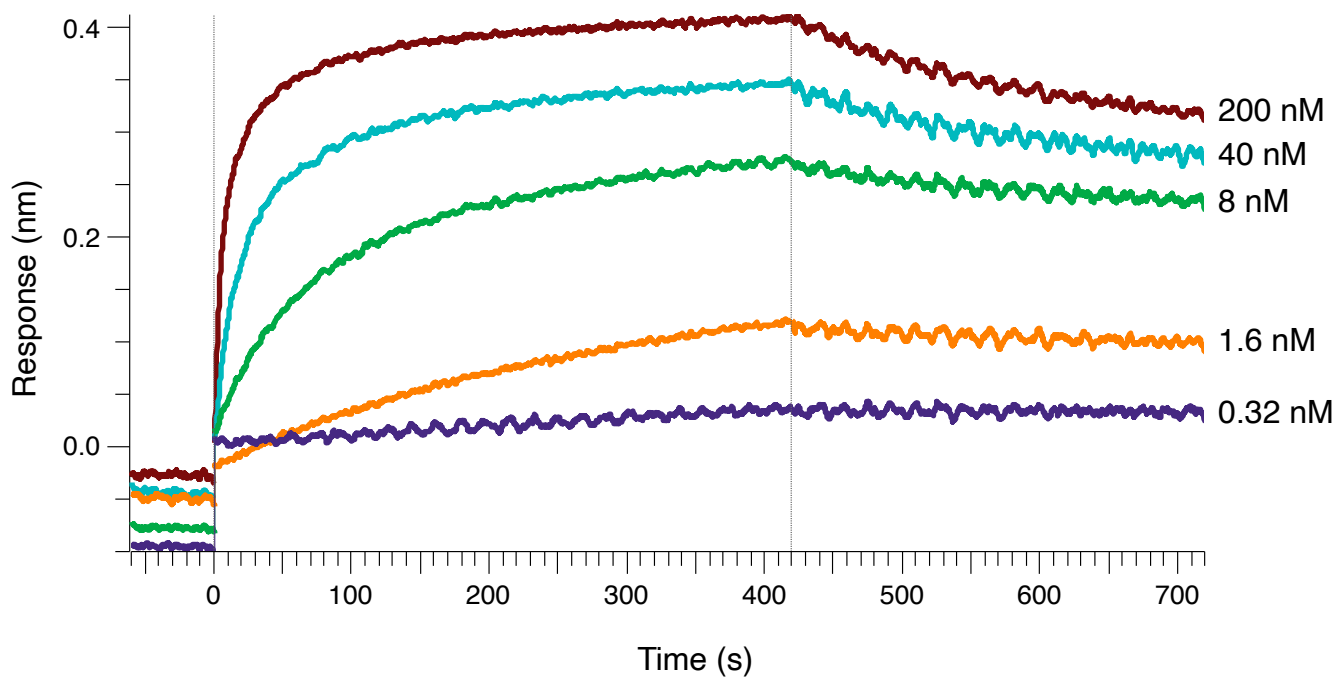

**Supplementary Figure 4. Binding analysis of anti-HAG cyclonal.** Bi-layer interferometry (BLI) affinity measurements for the anti-HAG cyclonal against GST-HAG. The cyclonal IgG was purified by protein A-based affinity capture. Response data are representative of replicate ( $n = 2$ ) BLI experiments.
