# Supplementary material for: Isolation of full-length IgG antibodies from combinatorial libraries expressed in the cytoplasm of Escherichia coli
Source: PubMed Central journal article supplement (PMC10267130; doi:10.1038/s41467-023-39178-x), 2023-06-14
Supplement: 41467_2023_39178_MOESM3_ESM.pdf [file 41467_2023_39178_MOESM3_ESM.pdf]

Title: Supplementary Dataset 1

Description: Excel spreadsheet with primers used in library construction
